# Supplementary material for: Social participation in older women and men: differences in community activities and barriers according to region and population size in Canada
Source: BMC Public Health. 2019 Aug 16;19:1124. doi: 10.1186/s12889-019-7462-1 (PMC6697934; doi:10.1186/s12889-019-7462-1)
Supplement: Supplementary file 1 — Gender distribution by region. (XLSX 17 kb) [file 12889_2019_7462_MOESM1_ESM.xlsx]

## Sheet: AF1
Supplementary file 1. Gender distribution by region
		Canadian region
		B.C.		Prairies		Ontario		Quebec		Atlantic		Canada
		n=2,042		n=3,741		n=3,496		n=2,730		n=4,265		n=16,274
		W	M	W	M	W	M	W	M	W	M	W	M
Continuous variables		Mean	Mean	Mean	Mean	Mean	Mean	Mean	Mean	Mean	Mean	Mean	Mean
		[95% CI]	[95% CI]	[95% CI]	[95% CI]	[95% CI]	[95% CI]	[95% CI]	[95% CI]	[95% CI]	[95% CI]	[95% CI]	[95% CI]
Age (Year)		75.1ab	74.1d†††	75.2b	74.2ac†††	75.1b	74.1cd†††	74.8a	73.6ab†††	74.8a	73.6b†††	75	73.9†††
		[74.8,75.3]	[73.8,74.3]	[75.0,75.3]	[74.0,74.0]	[75.0,75.3]	[73.9,74.3]	[74.6,75.0]	[73.4,73.8]	[74.6,75.0]	[73.4,73.8]	[74.9,75.1]	[73.8,74.1]
Household income (CAD)		44121a	55821a†††	41355a	58672a†††	47062a	61993a†††	32881b	43820b†††	35456b	44909b†††	41260	54681†††
		[39891,48351]	[50014,61629]	[38171,44538]	[54192,63153]	[43066,51058]	[57223,66763]	[30927,34834]	[39552,48089]	[32711,38201]	[41492,48326]	[39386,43135]	[52184,57177]
Categorical variables		%	%	%	%	%	%	%	%	%	%	%	%
		[95% CI]	[95% CI]	[95% CI]	[95% CI]	[95% CI]	[95% CI]	[95% CI]	[95% CI]	[95% CI]	[95% CI]	[95% CI]	[95% CI]
Education	Less than high school	30.6	24.5†	39.5a	35.0a†	39.8a	35.6a	59.1	48.8b†††	47.9	47.3b	44	38.0†††
		[26.4,34.8]	[20.8,28.2]	[36.4,42.5]	[31.7,38.4]	[36.6,43.0]	[32.3,39.0]	[55.2,63.1]	[44.8,52.8]	[44.9,50.8]	[43.7,50.9]	[42.2,45.9]	[36.2,39.8]
	High school	21.5a	15.0abc††	15.9ab	14.4ab	20.2a	15.5ab†	11.2c	10.5acd	13.2bc	9.9d†	16.9	13.6†††
		[17.8,25.1]	[12.0,17.9]	[13.5,18.4]	[11.9,16.9]	[17.7,22.6]	[12.6,18.3]	[8.8,13.6]	[8.1,12.9]	[11.3,15.0]	[8.0,11.8]	[15.6,18.2]	[12.3,15.6]
	College or greater	47.9a	60.5†††	44.6ab	50.5a††	40.0bc	48.9ab†††	29.7	40.7c†††	39.0c	42.7	39.1	48.4†††
		[43.6,52.3]	[56.0,65.1]	[41.5,47.8]	[46.8,54.3]	[36.8,43.3]	[45.3,52.5]	[26.3,33.1]	[36.9,44.4]	[36.3,41.7]	[39.3,46.2]	[37.4,40.8]	[46.5,50.2]
Driver's license		67.0ab	89.9ab†††	73.4	92.3a†††	62.1ac	86.9b†††	57.5c	88.7ab†††	64.7b	90.2ab†††	63.4	88.8†††
		[63.1,70.9]	[87.4,92.5]	[70.9,75.8]	[90.5,94.0]	[59.1,65.1]	[84.2,89.5]	[54.4,60.7]	[86.3,91.1]	[62.1,67.3]	[88.6,91.9]	[61.9,65.0]	[87.5,90.1]
Transportation	Car (driver or passenger)	80.6a	87.5ab†††	86.2a	92.1a†††	81.5b	87.4b††	76.4	86.6†††	92.8b	95.2	81.8	88.6†††
		[76.6,84.5]	[84.4,90.7]	[83.8,88.6]	[90.2,94.0]	[78.4,84.6]	[84.2,90.6]	[72.0,80.7]	[83.0,90.2]	[91.2,94.4]	[93.3,97.1]	[80.1,83.4]	[87.0,90.2]
	Bike or walk	13.2a	8.5a††	8.4b	5.3a††	13.2ab	7.9a†††	17.3a	8.5a†††	4.7	2.7†	12.7	7.3†††
		[9.7,16.7]	[5.9,11.1]	[6.6,10.1]	[3.8,6.8]	[10.8,15.7]	[5.5,10.2]	[13.6,21.0]	[5.6,11.3]	[3.4,6.1]	[1.3,4.0]	[11.4,14.1]	[6.1,8.5]
	Other pub. transit paratr., taxi, W/C	6.2a	4.0ab	5.4a	2.7ab††	5.2a	4.7a	6.4a	5.0ab	2.4	2.1b	5.5	4.1†
		[3.9,8.6]	[2.3,5.7]	[3.8,7.1]	[1.6,3.7]	[3.7,6.8]	[3.0,6.4]	[4.4,8.3]	[2.9,7.0]	[1.4,3.4]	[1.0,3.3]	[4.7,6.3]	[3.2,5.0]
Retired		93.4a	90.0ab	93.0a	86.5a†††	92.4a	86.3a†††	94.6a	93.6b	95.1a	93.2b	93.4	89.2†††
		[91.2,95.6]	[86.7,93.2]	[91.1,95.0]	[84.1,88.9]	[90.5,94.2]	[83.7,88.9]	[93.0,96.3]	[91.5,95.7]	[93.8,96.4]	[91.5,94.9]	[92.4,94.3]	[87.9,90.5]
Population size group	Rural area	9.2ab	11.5ab	5.7a	5.3a	15.2b	18.7b	19.9bc	21.2b	28.2c	31.2	15.2	17.2
		[3.2,15.1]	[4.4,18.6]	[3.4,7.9]	[3.0,7.5]	[11.6,18.7]	[14.6,22.8]	[15.0,24.8]	[16.3,26.1]	[23.9,32.4]	[27.0,35.5]	[13.0,17.3]	[14.9,19.5]
	Small	6.3a	7.4ab	5.1a	4.8acd	2.5a	1.8ce	2.9a	2.2ae	7.7a	8.7bd	3.9	3.7
		[1.9,10.7]	[2.9,11.9]	[2.6,7.6]	[2.5,7.2]	[0.7,4.4]	[0.4,3.2]	[0.5,5.3]	[0.2,4.1]	[4.7,10.7]	[5.5,12.0]	[2.7,5.1]	[2.6,4.7]
	Medium	14.1ab	13.1ab	11.6a	12.0ab	10.0a	7.9a	9.9a	12.3ab	19.9b	18.7b	11.5	11.2
		[8.8,19.5]	[7.9,18.2]	[7.4,15.8]	[7.6,16.5]	[6.3,13.7]	[4.7,11.0]	[5.9,14.0]	[7.5,17.2]	[16.2,23.6]	[15.1,22.2]	[9.5,13.6]	[9.3,13.1]
	Large	22.2ab	21.5a	33.6a	29.2a†	25.0a	24.9a	12.5b	9.6†	44.2	41.4	24.2	22.6
		[15.2,29.2]	[14.3,28.7]	[28.1,39.1]	[24.3,34.0]	[19.7,30.3]	[19.4,30.4]	[7.8,17.2]	[6.0,13.3]	[39.0,49.5]	[36.5,46.2]	[21.5,26.9]	[19.9,25.2]
	Metro	48.2a	46.5a	44.1a	48.8a†	47.3a	46.7a	54.8a	54.7a	‡	‡	45.2	45.4
		[39.6,56.9]	[37.5,55.5]	[38.4,49.7]	[42.8,54.7]	[41.3,53.3]	[40.6,52.7]	[48.0,61.6]	[48.2,61.3]	[‡,‡]	[‡,‡]	[42.2,48.3]	[42.1,48.6]
Living alone		47.8a	18.1a†††	49.0a	19.0a†††	50.8a	18.8a†††	52.1a	22.6a†††	51.5a	20.4a†††	50.5	19.8†††
		[43.3,52.3]	[15.4,20.7]	[45.6,52.3]	[16.5,21.4]	[47.9,53.7]	[16.5,21.1]	[49.1,55.0]	[19.7,25.4]	[49.1,53.9]	[18.2,22.5]	[48.9,52.1]	[18.5,21.0]
Immigrant		38.5	44.8†	19.4a	24.0a†	39.2a	43.4a	12.4	12.4	5.6	6.3	26.8	30.3††
		[34.0,43.1]	[40.0,49.6]	[16.8,22.0]	[20.7,27.3]	[35.3,43.1]	[39.0,47.7]	[9.5,15.3]	[9.2,15.5]	[4.4,6.7]	[4.9,7.8]	[25.0,28.6]	[28.2,32.3]
At least one chronic disease		92.4a	88.9a†	92.4a	91.4a	94.0a	88.0a†††	93.0a	88.0a†††	94.0a	91.5a†	93.3	88.9†††
		[90.4,94.4]	[86.3,91.6]	[90.6,94.2]	[89.6,93.2]	[92.5,95.5]	[85.4,90.5]	[91.1,94.9]	[85.8,90.2]	[92.6,95.5]	[89.7,93.3]	[92.5,94.2]	[87.7,90.1]
Cells that share a letter are not significantly different (p>0.05, Bonferroni Correction): lowercase between W/Region; lowercase italic between M/Region; uppercase between Region. † Men are significantly different than women († p<0.05, †† p<0.01, ††† p<0.001). ‡ no observation.
